# Supplementary material
Source: PubMed Central journal article supplement (PMC6362360)

**Fig 2 Source data file**

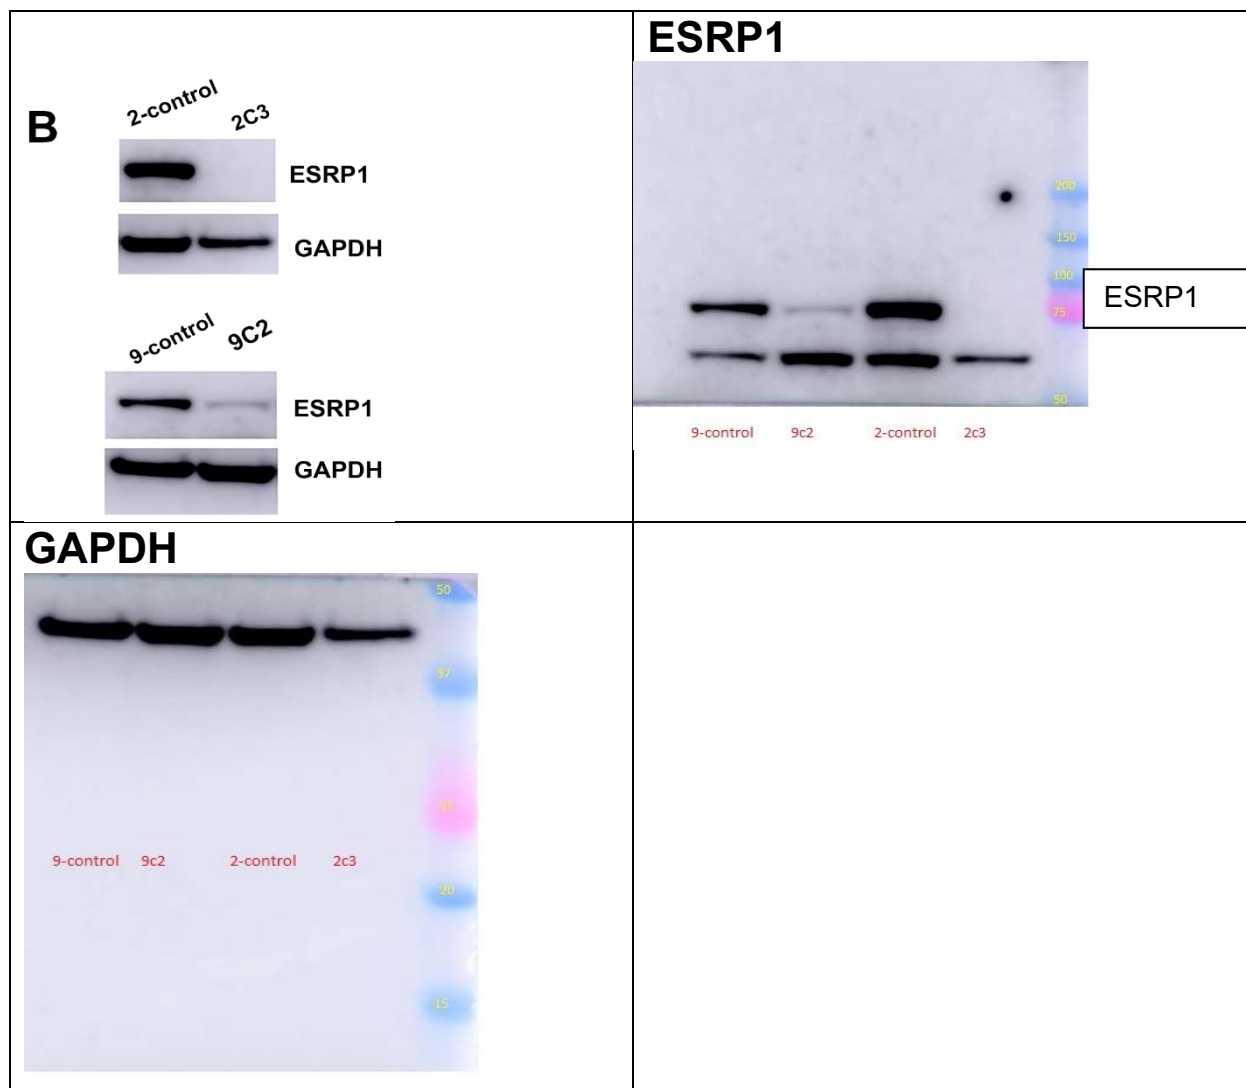

Supplement: EMBR-20-e46078-s003.pdf [file EMBR-20-e46078-s003.pdf]
